# Supplementary material for: Jesús Banegas: presidente de AETIC
Source: Royal Society of Chemistry journal article supplement (doi:10.1039/d0ra03759a), 2005-01-01
Supplement: d0ra03759a1.pdf [file d0ra03759a1.pdf]

## Supplementary information for

### **Design a p-n heterojunction in 0D/3D MoS<sub>2</sub>/g-C<sub>3</sub>N<sub>4</sub> composite for boosting the efficient separation of photogenerated carriers with enhanced visible-light-driven H<sub>2</sub> evolution**

*Biao Zhou<sup>a</sup>, Bo Yang<sup>a,\*</sup>, Muhammad Waqas<sup>a</sup>, Ke Xiao<sup>a</sup>, Caizhen Zhu<sup>a</sup>, Ling Wu<sup>b</sup>*

*<sup>a</sup> College of Chemistry and Environmental Engineering, Shenzhen University, Shenzhen 518060, PR China.*

*<sup>b</sup> Shenzhen Senior High School, Shenzhen 518040, PR China.*

\* Corresponding author

Dr. and Prof. Bo Yang

College of Chemistry and Environmental Engineering, Shenzhen University,  
Shenzhen 518060, PR China

Tel: +86 755 26732904

Fax: +86 755 26536141

E-mail: [boyang@szu.edu.cn](mailto:boyang@szu.edu.cn)

Figures S1-S4

Table S1

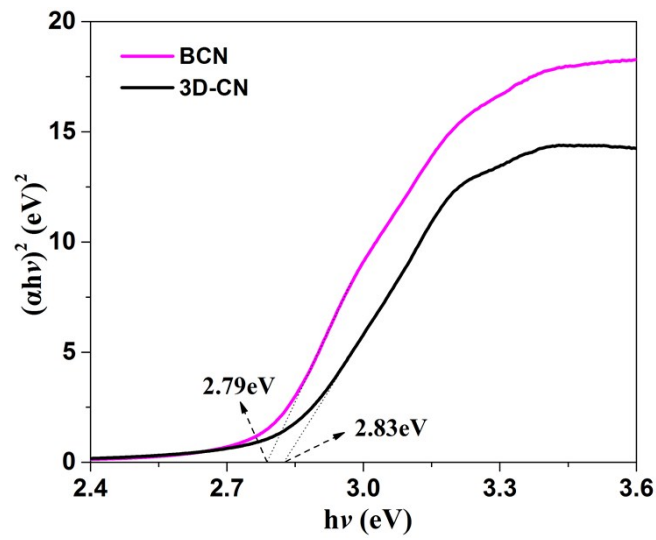

**Fig. S1** The optical bandgap of 3D-CN and BCN.

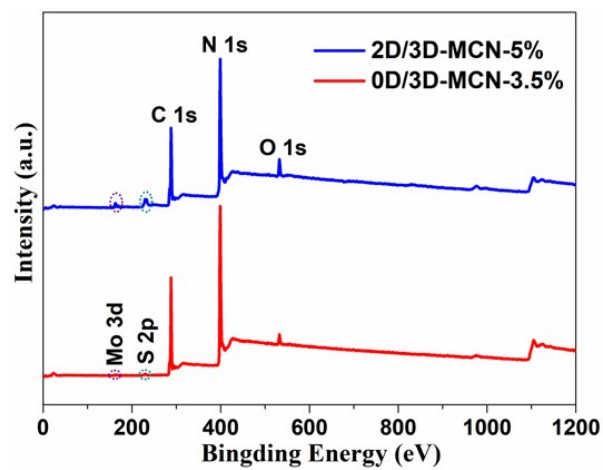

**Fig. S2** The XPS total spectra of 0D/3D-MCN-3.5% and 2D/3D-MCN-5%.

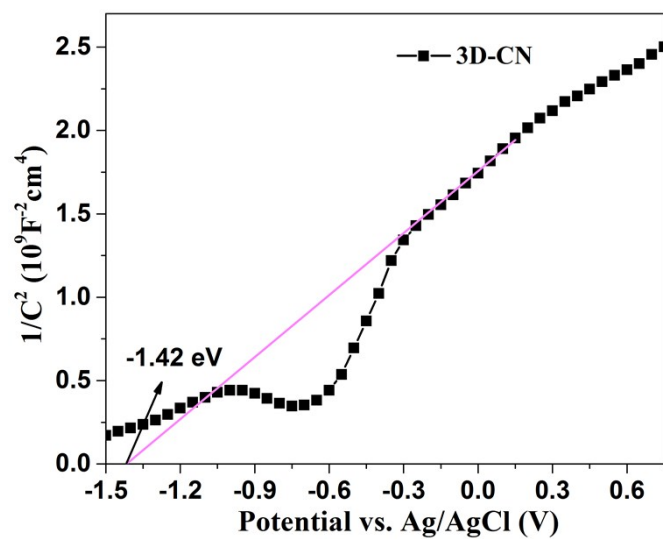

**Fig. S3** The Mott-Schottky curve of 3D-CN.

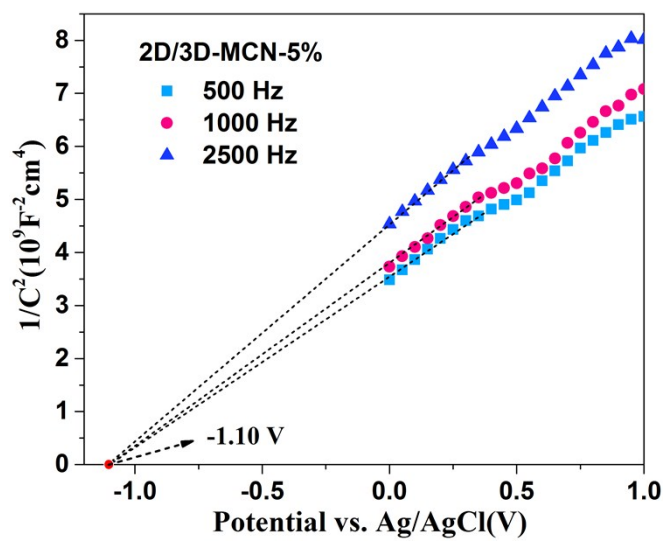

**Fig. S4** The Mott-Schottky curves of 2D/3D-MCN-5%.

**Table S1** The photocatalytic H<sub>2</sub> production performance of the g-C<sub>3</sub>N<sub>4</sub>-based photocatalysts reported in recent years and 0D/3D-MCN-3.5%.

| Photocatalysts                                                      | Light source             | Reaction conditions         | H <sub>2</sub> evolution rate                       | Ref.      |
|---------------------------------------------------------------------|--------------------------|-----------------------------|-----------------------------------------------------|-----------|
| (0D-2D) MoS <sub>2</sub> /g-C <sub>3</sub> N <sub>4</sub>           | 300W Xe lamp, λ > 420 nm | 2wt% Pt, methanol (25 vol%) | 222.9 μmol.h <sup>-1</sup> .g <sup>-1</sup> (50mg)  | [1]       |
| (2D-2D) MoS <sub>2</sub> /g-C <sub>3</sub> N <sub>4</sub>           | 300W Xe lamp, λ > 400 nm | methyl alcohol (10 vol%)    | 385.04 μmol.h <sup>-1</sup> .g <sup>-1</sup> (50mg) | [2]       |
| (3D-2D) MoS <sub>2</sub> /g-C <sub>3</sub> N <sub>4</sub>           | 300W Xe lamp, λ > 420 nm | 2wt% Pt, Methanol (25vol%)  | 533.99 μmol.h <sup>-1</sup> .g <sup>-1</sup> (50mg) | [3]       |
| (0D-2D) MoS <sub>2</sub> /g-C <sub>3</sub> N <sub>4</sub>           | 300W Xe lamp, λ > 400 nm | Lactic acid (20 vol%)       | 660 μmol.h <sup>-1</sup> .g <sup>-1</sup> (50mg)    | [4]       |
| (0D-2D)MoS <sub>2</sub> /N dope-g-C <sub>3</sub> N <sub>4</sub>     | 300W Xe lamp, λ > 420 nm | TEOA (10 vol%)              | 212.41 μmol.h <sup>-1</sup> .g <sup>-1</sup> (50mg) | [5]       |
| (0D-2D) MoS <sub>2</sub> /g-C <sub>3</sub> N <sub>4</sub>           | 300W Xe lamp, λ > 400 nm | TEOA (10 vol%)              | 252 μmol.h <sup>-1</sup> .g <sup>-1</sup> (10mg)    | [6]       |
| NiS <sub>2</sub> /g-C <sub>3</sub> N <sub>4</sub>                   | 300W Xe lamp, λ > 420 nm | TEOA (10 vol%)              | 715.83 μmol.h <sup>-1</sup> .g <sup>-1</sup> (50mg) | [7]       |
| Co <sub>3</sub> O <sub>4</sub> /g-C <sub>3</sub> N <sub>4</sub> /Pt | 300W Xe lamp, λ > 300 nm | TEOA (10 vol%)              | 610μmol.h <sup>-1</sup> .g <sup>-1</sup> (0.02g)    | [8]       |
| (0D-3D) MoS <sub>2</sub> /g-C <sub>3</sub> N <sub>4</sub>           | 300W Xe lamp, λ > 400 nm | Lactic acid (10 vol%)       | 817.1 μmol.h <sup>-1</sup> .g <sup>-1</sup> (50mg)  | This work |

## References:

- [1] Y. Liu, H. Zhang, J. Ke, J. Zhang, W. Tian, X. Xu, X. Duan, H. Sun, M. O Tade, S. Wang, *Appl. Catal. B-Environ.* 2018, **228**, 64-74.
- [2] W. Li, L. Wang, Q. Zhang, Z. Chen, X. Deng, C. Feng, L. Xu, M. Sun, J. Alloy. *Compd.* 2019, **808**, 151681.
- [3] Y. Liu, X. Xu, J. Zhang, H. Zhang, W. Tian, X. Li, M.O. Tade, H. Sun, S. Wang, *Appl. Catal. B-Environ.* 2018, **239**, 334-344.

- [4] X. Shi, M. Fujitsuka, S. Kim, T. Majima, *Small*. 2018, **14**, 1703277.
- [5] Y. Jiao, Q. Huang, J. Wang, Z. He, Z. Li, *Appl. Catal. B-Environ.* 2019, **247**, 124-132.
- [6] H. Zhao, Y. Dong, P. Jiang, H. Miao, G. Wang, J. Zhang, *J. Mater. Chem. A*. 2015, **3**, 7375-7381.
- [7] H.T. Li, M. Wang, Y.P. Wei, F. Long, *J. Colloid Interface Sci.* 2019, **534**, 343-349.
- [8] D. Zheng, X.N. Cao, X.C. Wang, *Angew. Chem. Int. Ed.* 2016, **55**, 11512-11516.
